# Supplementary material
Source: Royal Society of Chemistry journal article supplement (doi:10.1039/d6gc01307d)
Supplement: d6gc01307d1.pdf [file d6gc01307d1.pdf]

## Figures and screenshot of Figures authorization

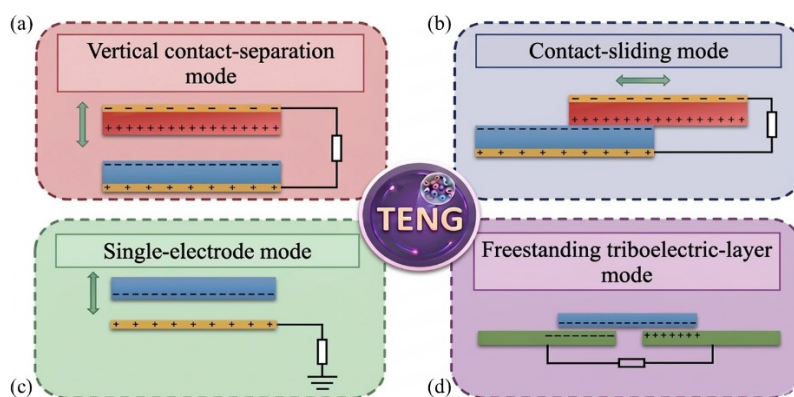

**Fig.1** The four fundamental operating modes of triboelectric nanogenerators: (a) vertical contact-separation mode; (b) contact-sliding mode; (c) single-electrode mode; (d) freestanding triboelectric-layer mode.

# Copyright License Certificate for Fig. 1

|                                                                                                                                                                                                                       |                                                                                                                                                                                                                                                                    |
|-----------------------------------------------------------------------------------------------------------------------------------------------------------------------------------------------------------------------|--------------------------------------------------------------------------------------------------------------------------------------------------------------------------------------------------------------------------------------------------------------------|
|                                                                                                                                      | <b>Triboelectric nanogenerators as self-powered active sensors</b><br>Author: Sihong Wang, Long Lin, Zhong Lin Wang<br>Publication: Nano Energy<br>Publisher: Elsevier<br>Date: January 2015<br><small>Copyright © 2014 Elsevier Ltd. All rights reserved.</small> |
| <b>Order Completed</b>                                                                                                                                                                                                |                                                                                                                                                                                                                                                                    |
| Thank you for your order.<br>This Agreement between Zepeng Zhang ("You") and Elsevier ("Elsevier") consists of your license details and the terms and conditions provided by Elsevier and Copyright Clearance Center. |                                                                                                                                                                                                                                                                    |
| Your confirmation email will contain your order number for future reference.                                                                                                                                          |                                                                                                                                                                                                                                                                    |
| <b>License Number</b>                                                                                                                                                                                                 | 6245190554555 <a href="#">Printable Details</a>                                                                                                                                                                                                                    |
| <b>License date</b>                                                                                                                                                                                                   | Apr 10, 2026                                                                                                                                                                                                                                                       |
| <b>Licensed Content</b>                                                                                                                                                                                               |                                                                                                                                                                                                                                                                    |
| <b>Licensed Content Publisher</b>                                                                                                                                                                                     | Elsevier                                                                                                                                                                                                                                                           |
| <b>Licensed Content Publication</b>                                                                                                                                                                                   | Nano Energy                                                                                                                                                                                                                                                        |
| <b>Licensed Content Title</b>                                                                                                                                                                                         | Triboelectric nanogenerators as self-powered active sensors                                                                                                                                                                                                        |
| <b>Licensed Content Author</b>                                                                                                                                                                                        | Sihong Wang, Long Lin, Zhong Lin Wang                                                                                                                                                                                                                              |
| <b>Licensed Content Date</b>                                                                                                                                                                                          | Jan 1, 2015                                                                                                                                                                                                                                                        |
| <b>Licensed Content Volume</b>                                                                                                                                                                                        | 11                                                                                                                                                                                                                                                                 |
| <b>Licensed Content Issue</b>                                                                                                                                                                                         | n/a                                                                                                                                                                                                                                                                |
| <b>Licensed Content Pages</b>                                                                                                                                                                                         | 27                                                                                                                                                                                                                                                                 |
| <b>About Your Work</b>                                                                                                                                                                                                |                                                                                                                                                                                                                                                                    |
| <b>Title of new article</b>                                                                                                                                                                                           | The impact and application of lignin fillers in triboelectric nanogenerators: from performance optimization to sustainable energy technology                                                                                                                       |
| <b>Lead author</b>                                                                                                                                                                                                    | Zepeng Zhang, Xiaoxue Zhao, Caixing Huang, Chenhui Lai, Qiang Yong                                                                                                                                                                                                 |
| <b>Title of targeted Journal</b>                                                                                                                                                                                      | Green Chemistry                                                                                                                                                                                                                                                    |
| <b>Publisher</b>                                                                                                                                                                                                      | Royal Society of Chemistry                                                                                                                                                                                                                                         |
| <b>Expected publication date</b>                                                                                                                                                                                      | Apr 2026                                                                                                                                                                                                                                                           |
| <b>Requestor Location</b>                                                                                                                                                                                             |                                                                                                                                                                                                                                                                    |
| <b>Requestor Location</b>                                                                                                                                                                                             | Mr. Zepeng Zhang<br>General Delivery<br>Nanjing, 210037<br>China                                                                                                                                                                                                   |
| <b>Order Details</b>                                                                                                                                                                                                  |                                                                                                                                                                                                                                                                    |
| <b>Type of Use</b>                                                                                                                                                                                                    | reuse in a journal/magazine                                                                                                                                                                                                                                        |
| <b>Requestor type</b>                                                                                                                                                                                                 | academic/educational institute                                                                                                                                                                                                                                     |
| <b>Portion</b>                                                                                                                                                                                                        | figures/tables/illustrations                                                                                                                                                                                                                                       |
| <b>Number of figures/tables/illustrations</b>                                                                                                                                                                         | 1                                                                                                                                                                                                                                                                  |
| <b>Format</b>                                                                                                                                                                                                         | electronic                                                                                                                                                                                                                                                         |
| <b>Are you the author of this Elsevier article?</b>                                                                                                                                                                   | No                                                                                                                                                                                                                                                                 |
| <b>Will you be translating?</b>                                                                                                                                                                                       | No                                                                                                                                                                                                                                                                 |
| <b>Additional Data</b>                                                                                                                                                                                                |                                                                                                                                                                                                                                                                    |
| <b>Portions</b>                                                                                                                                                                                                       | Graphical abstract                                                                                                                                                                                                                                                 |
| <b>The Requesting Person / Organization to Appear on the License</b>                                                                                                                                                  | Zepeng Zhang                                                                                                                                                                                                                                                       |
| <b>Tax Details</b>                                                                                                                                                                                                    |                                                                                                                                                                                                                                                                    |

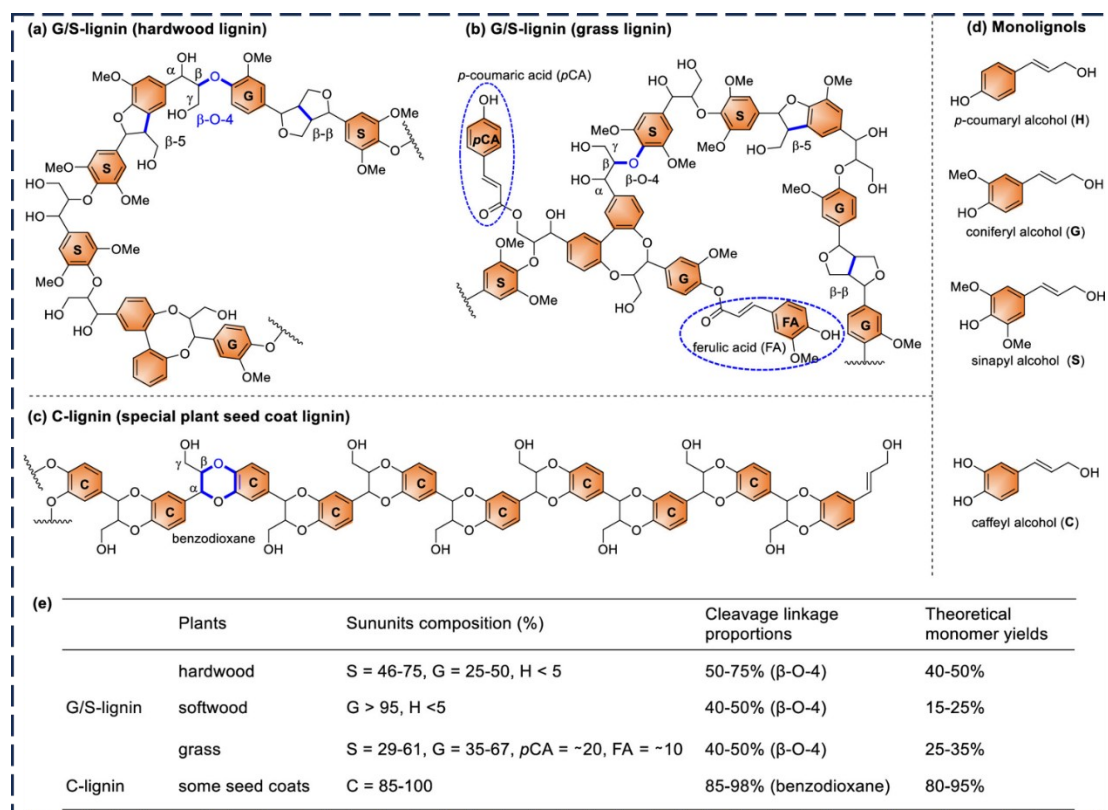

**Fig. 2** Representative lignin structures and typical linkage motifs: (a) G/S-type lignin from hardwood, (b) G/S-type lignin from grass, and (c) C-type lignin from certain seed coats. (d) Monomeric lignin's in different lignin samples. (e) Approximate subunit composition, linkage abundance, and theoretical monomer yield. Reproduced from

Ref. [18] with permission from the American Chemical Society, copyright 2025.

## Copyright License Certificate for Fig. 2

|                                                                                                                                                                                                                                             |                                                                                                                                                                                                                                                          |
|---------------------------------------------------------------------------------------------------------------------------------------------------------------------------------------------------------------------------------------------|----------------------------------------------------------------------------------------------------------------------------------------------------------------------------------------------------------------------------------------------------------|
| <b>Catalytic Hydrogenolysis of Lignin into Serviceable Products</b>                                                                                                                                                                         |                                                                                                                                                                                                                                                          |
|  ACS Publications<br><small>More Journals More Content More Read</small>                                                                                   | <b>Author:</b> Shuizhong Wang, Xiancheng Li, Rumin Ma, et al<br><b>Publisher:</b> Accounts of Chemical Research<br><b>Publisher:</b> American Chemical Society<br><b>Date:</b> Feb 1, 2025<br><small>Copyright © 2025, American Chemical Society</small> |
| <b>Order Completed</b>                                                                                                                                                                                                                      |                                                                                                                                                                                                                                                          |
| Thank you for your order.                                                                                                                                                                                                                   |                                                                                                                                                                                                                                                          |
| This Agreement between Zepeng Zhang ("You") and American Chemical Society ("American Chemical Society") consists of your license details and the terms and conditions provided by American Chemical Society and Copyright Clearance Center. |                                                                                                                                                                                                                                                          |
| Your confirmation email will contain your order number for future reference.                                                                                                                                                                |                                                                                                                                                                                                                                                          |
| <b>License Number</b>                                                                                                                                                                                                                       | 6238691058784 <a href="#">Printable Details</a>                                                                                                                                                                                                          |
| <b>License date</b>                                                                                                                                                                                                                         | Mar 30, 2026                                                                                                                                                                                                                                             |
| <b>Licensed Content</b>                                                                                                                                                                                                                     |                                                                                                                                                                                                                                                          |
| <b>Licensed Content Publisher</b>                                                                                                                                                                                                           | American Chemical Society                                                                                                                                                                                                                                |
| <b>Licensed Content Publication</b>                                                                                                                                                                                                         | Accounts of Chemical Research                                                                                                                                                                                                                            |
| <b>Licensed Content Title</b>                                                                                                                                                                                                               | Catalytic Hydrogenolysis of Lignin into Serviceable Products                                                                                                                                                                                             |
| <b>Licensed Content Author</b>                                                                                                                                                                                                              | Shuizhong Wang, Xiancheng Li, Rumin Ma, et al                                                                                                                                                                                                            |
| <b>Licensed Content Date</b>                                                                                                                                                                                                                | Feb 1, 2025                                                                                                                                                                                                                                              |
| <b>Licensed Content Volume</b>                                                                                                                                                                                                              | 53                                                                                                                                                                                                                                                       |
| <b>Licensed Content Issue</b>                                                                                                                                                                                                               | 4                                                                                                                                                                                                                                                        |
| <b>About Your Work</b>                                                                                                                                                                                                                      |                                                                                                                                                                                                                                                          |
| <b>Title of new article</b>                                                                                                                                                                                                                 | The impact and application of lignin fillers in triboelectric nanogenerators: from performance optimization to sustainable energy technology                                                                                                             |
| <b>Lead author</b>                                                                                                                                                                                                                          | Zepeng Zhang, Xiaoxue Zhao, Caoying Huang, Chenhuan Lai, Qiang Yong                                                                                                                                                                                      |
| <b>Title of targeted journal</b>                                                                                                                                                                                                            | Green Chemistry                                                                                                                                                                                                                                          |
| <b>Publisher</b>                                                                                                                                                                                                                            | Royal Society of Chemistry                                                                                                                                                                                                                               |
| <b>Expected publication date</b>                                                                                                                                                                                                            | Apr 2026                                                                                                                                                                                                                                                 |
| <b>Requestor Location</b>                                                                                                                                                                                                                   |                                                                                                                                                                                                                                                          |
| <b>Requestor Location</b>                                                                                                                                                                                                                   | Mr. Zepeng Zhang<br>General Delivery<br>Nanjing, 210037<br>China                                                                                                                                                                                         |
| <b>Order Details</b>                                                                                                                                                                                                                        |                                                                                                                                                                                                                                                          |
| <b>Type of Use</b>                                                                                                                                                                                                                          | Journal                                                                                                                                                                                                                                                  |
| <b>Requestor type</b>                                                                                                                                                                                                                       | Non-profit                                                                                                                                                                                                                                               |
| <b>Format</b>                                                                                                                                                                                                                               | Electronic                                                                                                                                                                                                                                               |
| <b>Portion</b>                                                                                                                                                                                                                              | Table/Figure/Micrograph                                                                                                                                                                                                                                  |
| <b>Number of Tables/Figures/Micrographs</b>                                                                                                                                                                                                 | 1                                                                                                                                                                                                                                                        |
| <b>Additional Data</b>                                                                                                                                                                                                                      |                                                                                                                                                                                                                                                          |
| <b>Portions</b>                                                                                                                                                                                                                             | Figure 1                                                                                                                                                                                                                                                 |
| <b>The Requesting Person / Organization to Appear on the License</b>                                                                                                                                                                        | Zepeng Zhang                                                                                                                                                                                                                                             |
| <b>Tax Details</b>                                                                                                                                                                                                                          |                                                                                                                                                                                                                                                          |

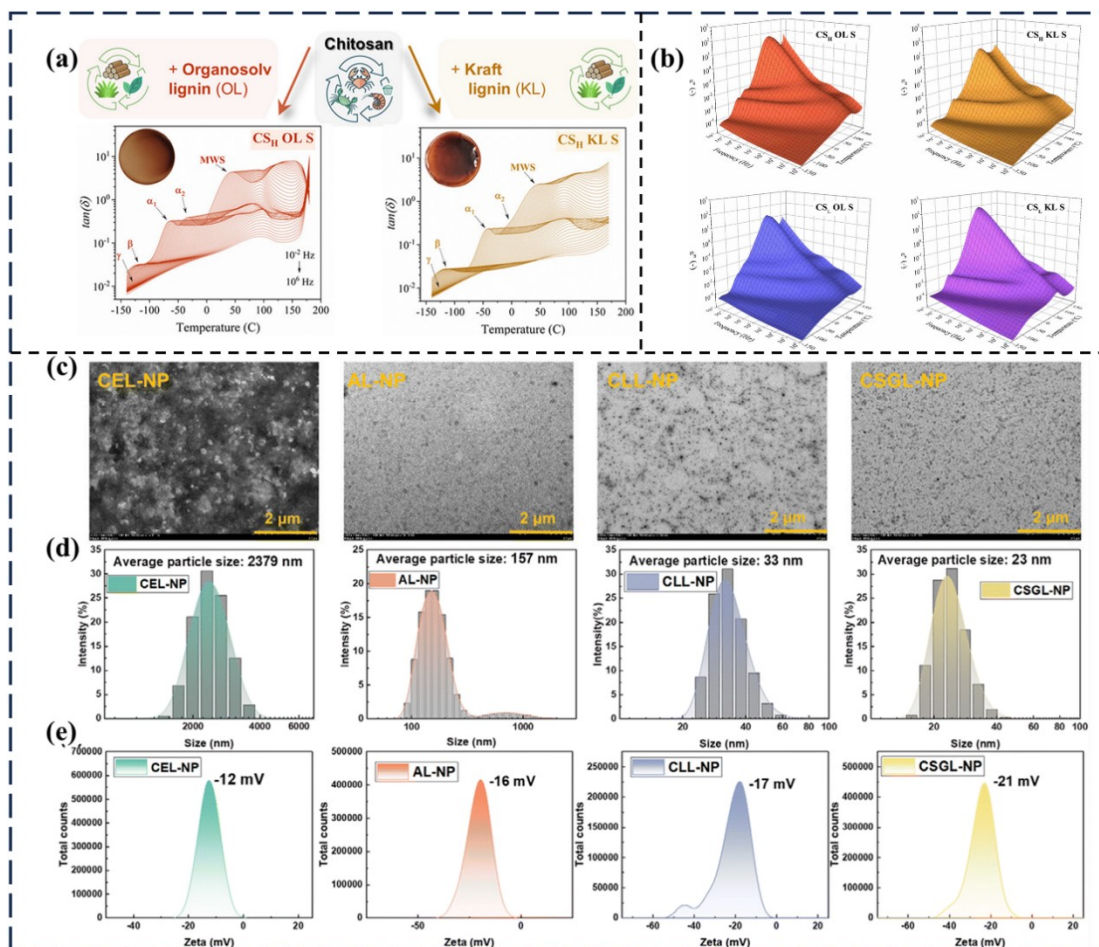

**Fig. 3** (a) Isochronal plot of the dielectric loss factor  $\tan(\delta)$  of the protonated chitosan-lignin composites; (b) Three-dimensional plot of the imaginary permittivity ( $\epsilon''$ ) of the protonated chitosan-lignin composites; Reproduced from Ref. [32] with permission from the American Chemical Society, copyright 2025. LNPs prepared from different types of lignin (c) TEM; (d) particle size; (e)  $\zeta$ -potential. Reproduced from Ref. [35] with permission from the Royal Society of Chemistry, copyright 2024.

## Copyright License Certificate for Fig. 3

Fig. 3a-b

ACS Publications | ACS Publications | C&EN | CAS

ACS Publications  
Most trusted. Most cited. Most read.

Search text, DOI, authors, etc.

Biomacromolecules > Vol 26/Issue 9 > Article

Open Access

ARTICLE | August 26, 2025

### Dielectric Characterization of Protonated Chitosan-Lignin Biocomposite Membranes: Influence of Chitosan and Lignin Types

Mark H. Wolf, Nagore Izaguirre, Jalel Labidi, and Amparo Ribes-Grua\*

Open PDF | Supporting Information (1)

#### Abstract

Biobased chitosan-lignin composite membranes with tailored dielectric and conductive properties were developed using chitosan of high (CS<sub>H</sub>) and low (CS<sub>L</sub>) molecular weight and degree of deacetylation, combined with kraft (KL) and organosolv lignin (OL) as fillers. The membranes were protonated by immersion in 1.0 M sulfuric acid. CS<sub>H</sub> composites exhibit stronger ionic interactions with sulfate groups compared to CS<sub>L</sub> composites, resulting in a dense structure that hinders water absorption and increases fragility. Chitosan interactions with sulfuric acid and lignin restrict the mobility of dielectric relaxations, with KL having a more pronounced effect than OL due to its smaller size and higher phenolic OH content. The membranes act as electrical insulators, exhibiting electron conductivities ranging from 10<sup>-15</sup> to 10<sup>-8</sup> S/cm between -10 and 170 °C, and proton conductivities between 2.9 × 10<sup>-3</sup> and 4.4 × 10<sup>-3</sup> S/cm at 60 °C. These properties make them promising candidates for use as biobased electrolytes in fuel cell applications.

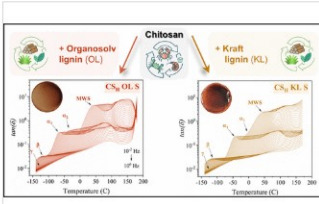

This publication is licensed under [CC-BY 4.0](#).

Copyright © 2025 The Authors. Published by American Chemical Society.

**Subjects**

Biopolymers | Composites | Insulators

#### 1. Introduction

The depletion and rising costs of fossil fuels, along with environmental damage, have spurred growing interest in biobased resources, such as chitin and lignin, provide eco-

**License Summary\***  
You are free to share (copy and redistribute) this article in any medium or format and to adapt (remix, transform, and build upon) the material for any purpose, even commercially within the parameters below:  
© Creative Commons (CC): This is a Creative Commons license.  
① Attribution (BY): Credit must be given to the creator.  
[View full license](#)  
\*Disclaimer: This summary highlights only some of the key features and terms of the actual license. It is not intended to be a substitute for the full license text.

Fig. 3c-e

ROYAL SOCIETY OF CHEMISTRY

Log in / register

Issue 8, 2024

From the journal: **Green Chemistry**

### Preparation of homogeneous lignin nanoparticles by efficient extraction of lignin and modification of its molecular structure using a functional deep eutectic solvent containing $\gamma$ -valerolactone

Mingzhu Yao,<sup>a</sup> Baojie Liu,<sup>a</sup> Lina Qin,<sup>a</sup> Zicheng Du,<sup>a</sup> Zenglin Wang,<sup>a</sup> Chengrong Qin,<sup>a</sup> Chen Liang,<sup>a</sup> Caoping Huang<sup>b</sup> and Shuangquan Yao<sup>a,\*</sup>

**Abstract**

Deep eutectic solvents (DESs) are widely used as recyclable green solvents for the separation of lignin from lignocellulosic biomass. However, the poor permeability of DES solution limits the green advancement of separation systems. In addition, lignin fragment molecules are susceptible to repolymerization reactions during separation, resulting in reduced lignin reactivity. In this study, a DES consisting of choline chloride (ChCl) as a hydrogen acceptor, 5-sulfosalicylic acid (5Saa) as a hydrogen donor, and a certain amount of  $\gamma$ -valerolactone (GVL) as an additive was designed. The system not only efficiently fractionated lignin from poplar (71.35%), but also selectively retained almost

**Preparation of homogeneous lignin nanoparticles by efficient extraction of lignin and modification of its molecular structure using a functional deep eutectic solvent containing  $\gamma$ -valerolactone**

M. Yao, B. Liu, L. Qin, Z. Du, Z. Wang, C. Qin, C. Liang, C. Huang and S. Yao, *Green Chem.*, 2024, **26**, 4528 DOI: 10.1039/D3GC04897G

To request permission to reproduce material from this article, please go to the [Copyright Clearance Center request page](#).

If you are an author contributing to an RSC publication, you do not need to request permission provided correct acknowledgement is given.

If you are the author of this article, you do not need to request permission to reproduce figures and diagrams provided correct acknowledgement is given. If you want to reproduce the whole article in a third-party publication (excluding your thesis/dissertation for which permission is not required) please go to the [Copyright Clearance Center request page](#).

Read more about [how to correctly acknowledge RSC content](#).

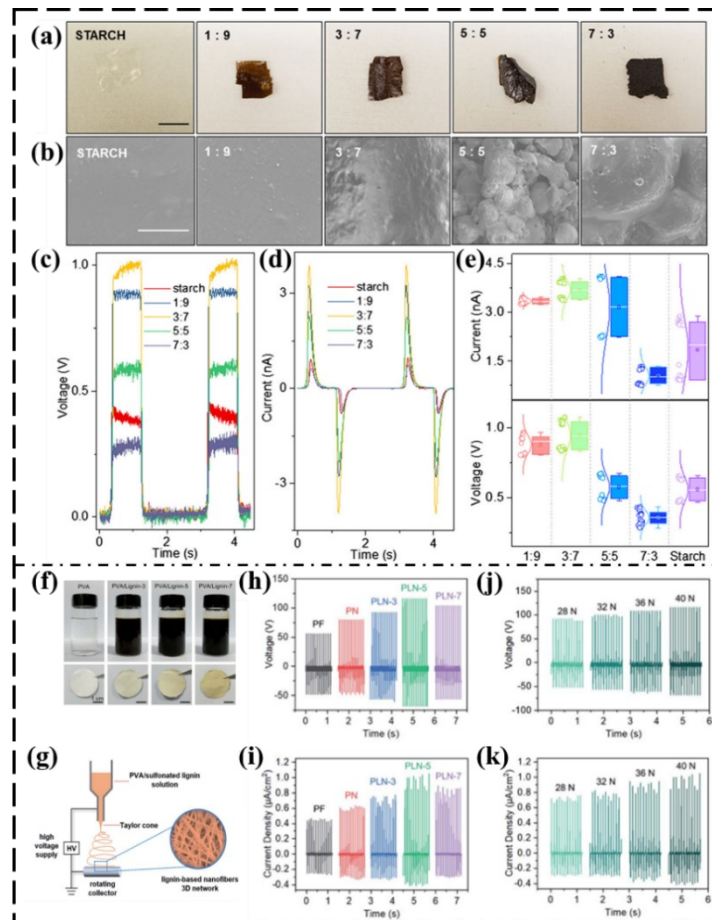

**Fig. 4** Lignin-starch nanocomposite TENG. (a) Optical images of the lignin-starch films composed of different concentrations of lignin. Scale bar: 3.5 cm. (b) Scanning electron microscope images of the lignin-starch films showing the various surface morphologies. Scale bar: 100  $\mu\text{m}$ . (c) Open-circuit voltages and (d) short-circuit current of the lignin-starch films. (e) Statistical results of the TENG outputs for each film. Reproduced from Ref. [37] with permission from the American Institute of Physics, copyright 2017. (f) Photographs of PVA solution, PVA/lignin solutions with lignin concentrations of 30%, 50%, and 70%, and their corresponding electrospun nanofibers; (g) Schematic illustration of the preparation process for lignin-based electrospun nanofibers; Output voltage (h) and current density (i) of TENGs based on PVA film (PF), PVA nanofibers (PN), and PVA/lignin composite electrospun nanofibers (PLN) measured at 40 N and 10 Hz; Output voltage (j) and current density (k) of the PLN-5 TENG under different applied forces at a constant frequency of 10 Hz. Reproduced from Ref. [59] with permission from the Royal Society of Chemistry, copyright 2022.

# Copyright License Certificate for Fig. 4

Fig. 4a-e

CCC RightsLink 🔍



**Lignin biopolymer based triboelectric nanogenerators**  
Author: Bao, Yukai; Wang, Ruoxing  
Publication: AIP Materials  
Publisher: AIP Publishing  
Date: May 31, 2017  
Copyright © 2017, Author(s). This article is distributed under a Creative Commons Attribution (CC BY) license.

**Creative Commons**  
This is an open access article distributed under the terms of the [Creative Commons CC BY](#) license, which permits unrestricted use, distribution, and reproduction in any medium, provided the original work is properly cited.  
You are not required to obtain permission to reuse this article.

Fig. 4f-k

Issue 8, 2022[Previous Article](#) [Next Article](#)



From the journal:  
**Sustainable Energy & Fuels**

### Sustainable lignin-based electrospun nanofibers for enhanced triboelectric nanogenerators †

[Check for updates](#)

[Junya Wang](#), <sup>‡</sup> [Yanglei Chen](#), <sup>‡</sup> [Yanglei Xu](#), <sup>‡</sup> [Jiahui Mu](#), <sup>‡</sup> [Junying Li](#), <sup>‡</sup> [Shuangxi Nie](#), <sup>‡</sup> [Sheng Chen](#) <sup>\*,ab</sup> and [Feng Xu](#) <sup>\*,a</sup>

[Author affiliations](#)

**Abstract**

Recently, sustainable triboelectric nanogenerators (TENGs) based on biodegradable biomaterials have attracted tremendous attention to efficiently harvest mechanical energy in a cost-effective and environmentally friendly strategy. Lignin, as the second most abundant biopolymer on earth, however, requires further development for TENGs with improved power generation. Herein, we have fabricated sustainable hybrid lignin-based nanofibers (LNFs) via electrospinning and prepared LNF-based TENGs. By adjusting the lignin content in the composite nanofibers, we achieved the tuning of LNFS' microstructure and tribo-polarity. The obtained TENGs are endowed with enhanced output performance due to the strong tribo-positivity of lignin and the high specific surface area of the 3D-network LNFS. The optimized output is realized after the trade-off between improved tribo-positivity and formed beads that

**About** **Cited by** **Related**

#### Sustainable lignin-based electrospun nanofibers for enhanced triboelectric nanogenerators

J. Wang, Y. Chen, Y. Xu, J. Mu, J. Li, S. Nie, S. Chen and F. Xu, *Sustainable Energy Fuels*, 2022, **6**, 1974 DOI: 10.1039/D1SE02005F

To request permission to reproduce material from this article, please go to the [Copyright Clearance Center request page](#).

If you are an author contributing to an RSC publication, you do not need to request permission provided correct acknowledgement is given.

If you are the author of this article, you do not need to request permission to reproduce figures and diagrams provided correct acknowledgement is given. If you want to reproduce the whole article in a third-party publication (excluding your thesis/dissertation for which permission is not required) please go to the [Copyright Clearance Center request page](#).

Read more about [how to correctly acknowledge RSC content](#).

✕

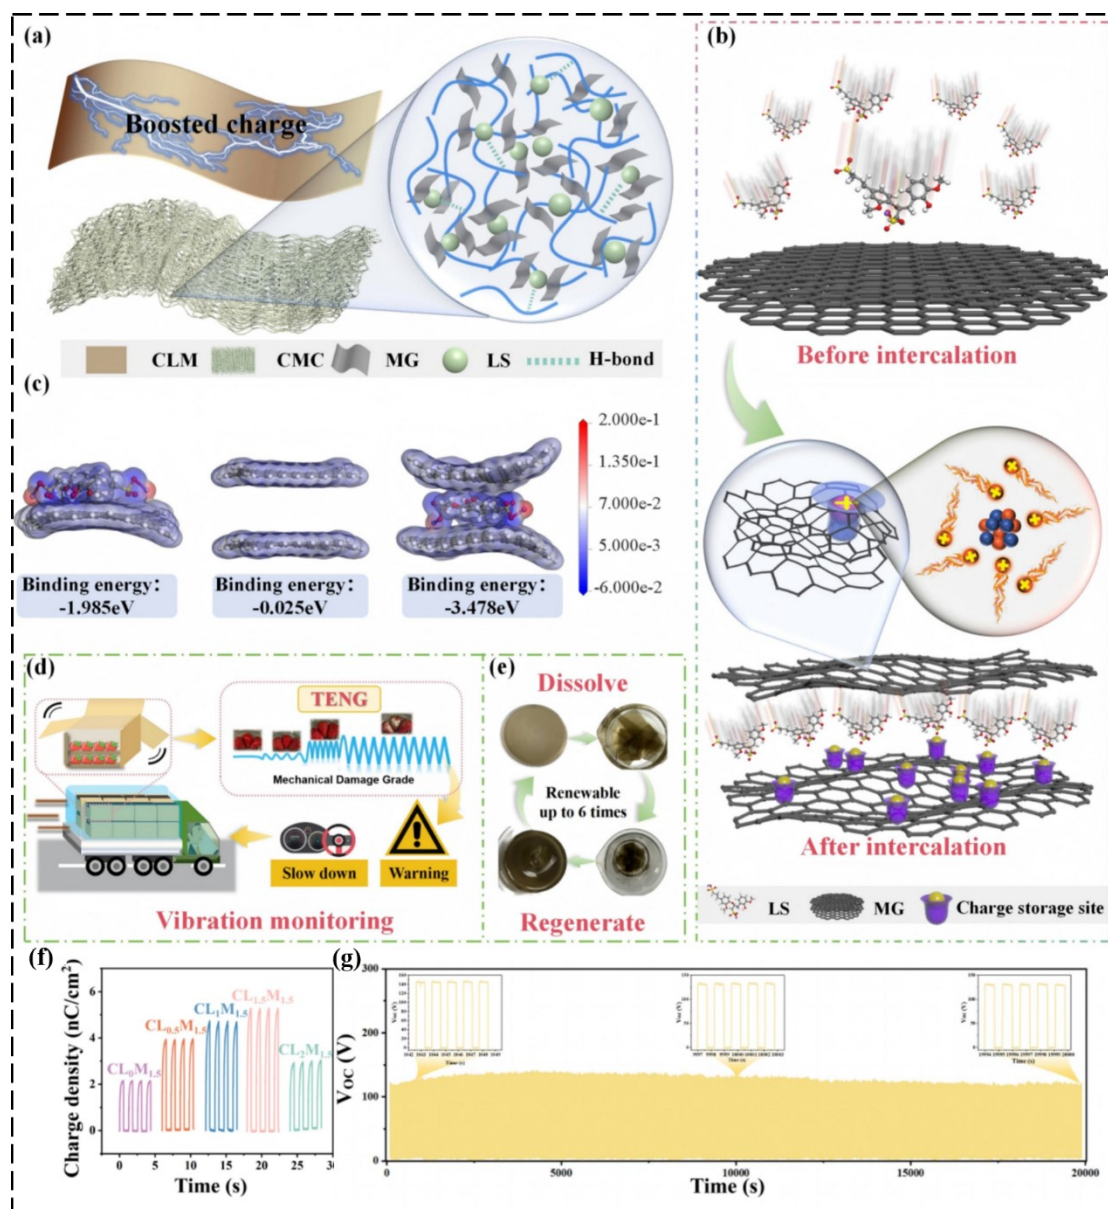

**Fig.5** (a) Schematic diagram of contact electrification between carboxymethyl cellulose/sodium lignosulfonate/multilayer graphene (CLM) and PVDF; (b) Intercalation effect of LS within MG; (c) Binding energy between MG and LS calculated via DFT; (d) Potential application of the CLM-TENG in monitoring impact conditions during fruit transportation; (e) Reusability of the CLM composite; (f) Charge density of the CLM-TENG; (g) Long-term stability of the CL<sub>1.5</sub>M<sub>1.5</sub>-TENG over 40,000 cycles in ambient atmosphere. Reproduced from Ref. [64] with permission from the Elsevier, copyright 2025.

# Copyright License Certificate for Fig. 5

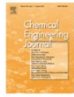

Inserting sodium lignosulfonate into multilayer graphene in boosting the interfacial polarization of triboelectric nanogenerators for monitoring the impact state of fruits

Author: Meiyl Chen, Xin Li, Tianshuang Bao, Cheng Cai, Yehan Tao, Jie Lu, Chenglong Fujinwen Hu, Jun Xie, Xiaodong Xia, Xuejiao Wang, Jian Du, Haisong Wang

Publisher: Chemical Engineering Journal

Publisher: Elsevier

Date: 15 October 2025

© 2025 Elsevier B.V. All rights are reserved, including those for text and data mining, AI training, and similar technologies.

## Order Completed

Thank you for your order.

This Agreement between Zepeng Zhang ("You") and Elsevier ("Elsevier") consists of your license details and the terms and conditions provided by Elsevier and Copyright Clearance Center.

Your confirmation email will contain your order number for future reference.

License Number 6238691383568

License date Mar 30, 2026

[Printable Details](#)

### Licensed Content

**Licensed Content Publisher** Elsevier  
**Licensed Content Publication** Chemical Engineering Journal  
**Licensed Content Title** Inserting sodium lignosulfonate into multilayer graphene in boosting the interfacial polarization of triboelectric nanogenerators for monitoring the impact state of fruits  
**Licensed Content Author** Meiyl Chen, Xin Li, Tianshuang Bao, Cheng Cai, Yehan Tao, Jie Lu, Chenglong Fujinwen Hu, Jun Xie, Xiaodong Xia, Xuejiao Wang, Jian Du, Haisong Wang  
**Licensed Content Date** Oct 15, 2025  
**Licensed Content Volume** 522  
**Licensed Content Issue** n/a  
**Licensed Content Pages** 1

### About Your Work

**Title of new article** The impact and application of lignin fillers in triboelectric nanogenerators: from performance optimization to sustainable energy technology  
**Lead author** Zepeng Zhang, Xiaosue Zhao, Coking Huang, Chenhuan Lai, Qiang Yong  
**Title of targeted journal** Green Chemistry  
**Publisher** Royal Society of Chemistry  
**Expected publication date** Apr 2026

### Requestor Location

Mr. Zepeng Zhang  
General Delivery

Requestor Location

### Order Details

**Type of Use** reuse in a journal/magazine  
**Requestor type** academic/educational institute  
**Portion** figures/tables/illustrations  
**Number of figures/tables/illustrations** 1  
**Format** electronic  
**Are you the author of this Elsevier article?** Yes  
**Will you be translating?** No

### Additional Data

**Portions** Figure 1  
**The Requesting Person / Organization to Appear on the License** Zepeng Zhang

### Tax Details

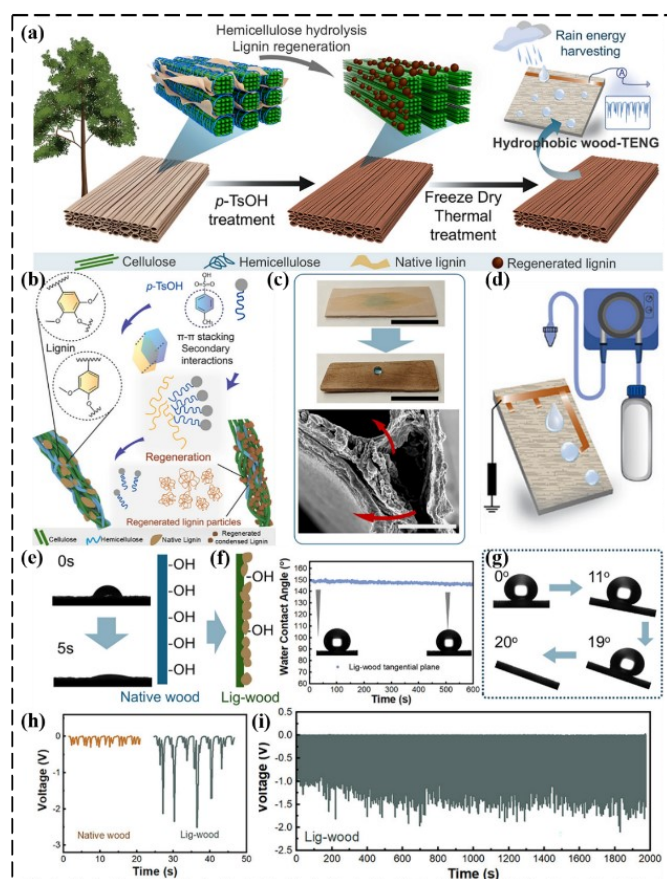

**Fig. 6** (a) Schematic diagram of the process for converting wood into a superhydrophobic TENGs material; (b) Schematic illustrating the structural and morphological changes of lignin during the wood treatment process; (c) Photographs of unmodified wood and lignin-modified wood after dyed water droplet deposition (scale bar = 2 cm). A SEM image is included, revealing the microstructure of the cross-section of the lignin-wood and indicating the formation of spherical lignin particles (scale bar = 200  $\mu\text{m}$ ). (d) Schematic of the assembled liquid–solid (L-S) TENG in single-electrode mode; (e) Static water contact angle measured on unmodified wood over 5 seconds and a schematic of its surface properties; (f) Surface changes of the native lignin (Lig-wood) and its static water contact angle on the tangential plane (measured over 600 s, with WCA images shown at 10 s and 500 s); (g) Rolling water contact angle of the Lig-wood; (h) Voltage output generated by unmodified wood and Lig-wood; (i) Cyclic voltage output of a water droplet continuously falling onto the Lig-wood for 2000 s. Reproduced from Ref. [76] with permission from the

# Copyright License Certificate for Fig. 6

WILEY  
**ADVANCED**

Nanjing Forestry Univ

Search 

Login / Register

HOME

JOURNALS

PUBLISH WITH ADVANCED

SPECIAL COLLECTIONS

ADVANCED COMMUNITY

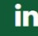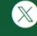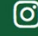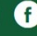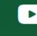

## ADVANCED FUNCTIONAL MATERIALS

Research Article | [Open Access](#) |  

### Native Lignin Migration and Clustering in Wood: Superhydrophobic, Antimold, and Tribonegative Layers for Rain-Driven Electrification

[Xuetong Shi](#), [Ran Bi](#), [Xin Shu](#), [Peipei Wang](#), [Yeedo Chun](#), [Zhixiang Chen](#), [Chris Zhou](#), [Yi Lu](#), [Orlando J. Rojas](#)

First published: 21 April 2025 | <https://doi.org/10.1002/adfm.202504381> | [VIEW METRICS](#)

SECTIONS

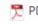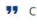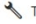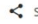

#### Abstract

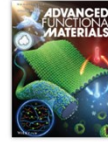

Volume 35, Issue 39  
September 25, 2025  
2504381

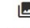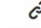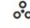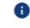

Figures

References

Related

Information

#### Details

© 2025 The Author(s). Advanced Functional Materials published by Wiley-VCH GmbH

This is an open access article under the terms of the Creative Commons Attribution License, which permits use, distribution and reproduction in any medium, provided the original work is properly cited.

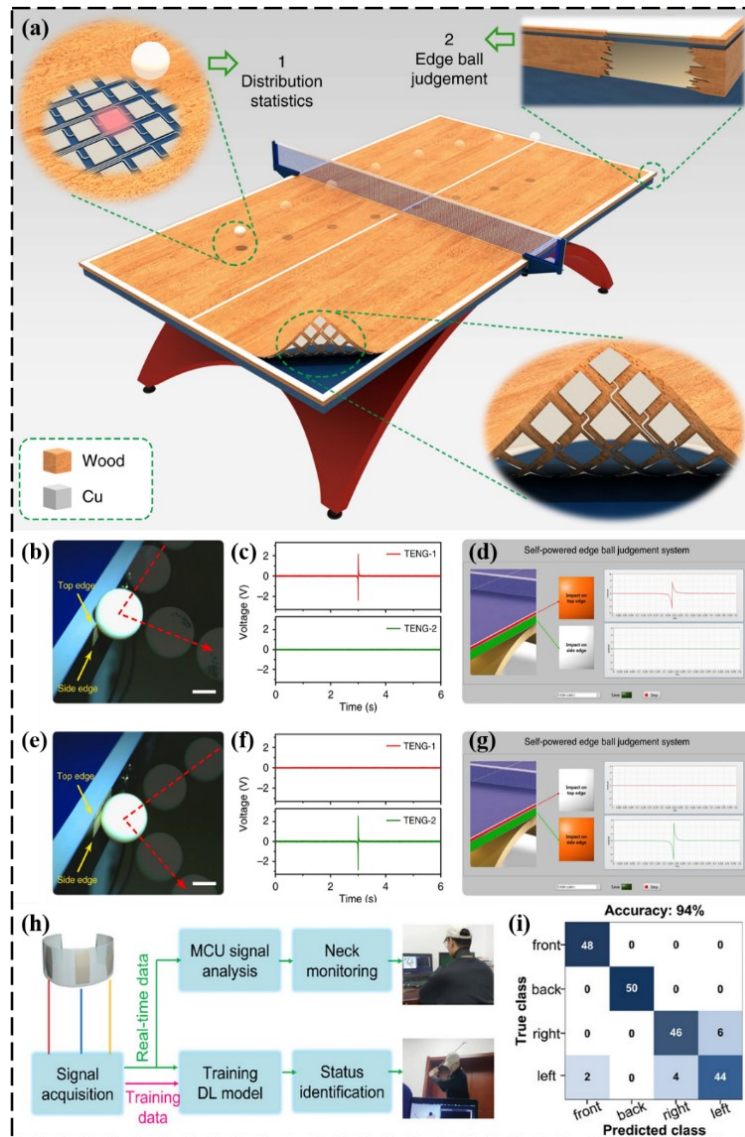

**Fig. 7** (a) Schematic diagram of a natural wood-based intelligent table tennis table. Demonstration of the self-powered edge ball judgment system when the ball hits the table's top edge: (b) photograph, (c) output signals from the two W-TENGs, and (d) screenshot of the real-time judgment result displaying "Ball hits the table's top edge". Scale bar: 2 cm. Demonstration of the self-powered system when the ball hits the table's side edge: (e) photograph, (f) output signals from the two W-TENGs, and (g) screenshot of the real-time judgment result displaying "Ball hits the table's side edge". Scale bar: 2 cm. Reproduced from Ref. [113] with permission from the Springer Nature, copyright 2019. (h) Workflow diagram of the intelligent behavior monitoring system. (i) Confusion matrix for the recognition of four different neck movement states, achieving a recognition accuracy of 94%. Reproduced from Ref. [114] with permission from the Wiley, copyright 2023.

# Copyright License Certificate for Fig. 7

## Fig. 7a-g

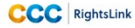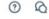

**Flexible and durable wood-based triboelectric nanogenerators for self-powered sensing in athletic big data analytics**  
 Author: Jianjun Luo et al  
 Publications: Nature Communications  
 Publisher: Springer Nature  
 Date: Nov 26, 2019  
 Copyright © 2019. The Author(s)

**SPRINGER NATURE**

**Creative Commons**  
 This is an open access article distributed under the terms of the Creative Commons Attribution (CC BY) license, which permits unrestricted use, distribution, and reproduction in any medium, provided the original work is properly cited.  
 You are not required to obtain permission to reuse this article.  
 To request permission for a type of use not listed, please contact Springer Nature

## Fig. 7h-i

**Deep - Learning - Assisted Neck Motion Monitoring System Self - Powered Through Biodegradable Triboelectric Sensors**  
 Author: Fengjin Sun, Yongsheng Zhu, Changjun Jia, et al  
 Publications: Advanced Functional Materials  
 Publisher: John Wiley and Sons  
 Date: Dec 17, 2023  
 © 2023 Wiley - VCH GmbH

**Order Completed**

Thank you for your order.  
 This Agreement between Zepeng Zhang ("You") and John Wiley and Sons ("John Wiley and Sons") consists of your license details and the terms and conditions provided by John Wiley and Sons and Copyright Clearance Center.

Your confirmation email will contain your order number for future reference.

|                              |                                                                                                                                              |                                                                                            |
|------------------------------|----------------------------------------------------------------------------------------------------------------------------------------------|--------------------------------------------------------------------------------------------|
| License Number               | 6238710252922                                                                                                                                | <a href="#">Printable Details</a>                                                          |
| License date                 | Mar 30, 2026                                                                                                                                 |                                                                                            |
| <b>Licensed Content</b>      |                                                                                                                                              | <b>Order Details</b>                                                                       |
| Licensed Content Publisher   | John Wiley and Sons                                                                                                                          | Type of use                                                                                |
| Licensed Content Publication | Advanced Functional Materials                                                                                                                | Requester type                                                                             |
| Licensed Content Title       | Deep - Learning - Assisted Neck Motion Monitoring System Self - Powered Through Biodegradable Triboelectric Sensors                          | Is the reuse sponsored by or associated with a pharmaceutical or medical products company? |
| Licensed Content Author      | Fengjin Sun, Yongsheng Zhu, Changjun Jia, et al                                                                                              | Format                                                                                     |
| Licensed Content Date        | Dec 17, 2023                                                                                                                                 | Portion                                                                                    |
| Licensed Content Volume      | 34                                                                                                                                           | Number of figures/tables                                                                   |
| Licensed Content Issue       | 13                                                                                                                                           | Will you be translating?                                                                   |
| Licensed Content Pages       | 9                                                                                                                                            | Circulation                                                                                |
| <b>About Your Work</b>       |                                                                                                                                              | <b>Additional Data</b>                                                                     |
| Title of new article         | The impact and application of lignin fillers in triboelectric nanogenerators: from performance optimization to sustainable energy technology | Portions                                                                                   |
| Lead author                  | Zepeng Zhang, Xiaoxue Zhao, Caixing Huang, Chenhui Lai, Qiang Yong                                                                           | The Requesting Person / Organization to Appear on the License                              |
| Title of targeted Journal    | Green Chemistry                                                                                                                              | Figure 5                                                                                   |
| Publisher                    | Royal Society of Chemistry                                                                                                                   | Zepeng Zhang                                                                               |
| Expected publication date    | Apr 2026                                                                                                                                     |                                                                                            |
| <b>Requestor Location</b>    |                                                                                                                                              | <b>Tax Details</b>                                                                         |
| Requestor Location           | Mr. Zepeng Zhang<br>General Delivery<br>Nanjing, 210037<br>China                                                                             |                                                                                            |

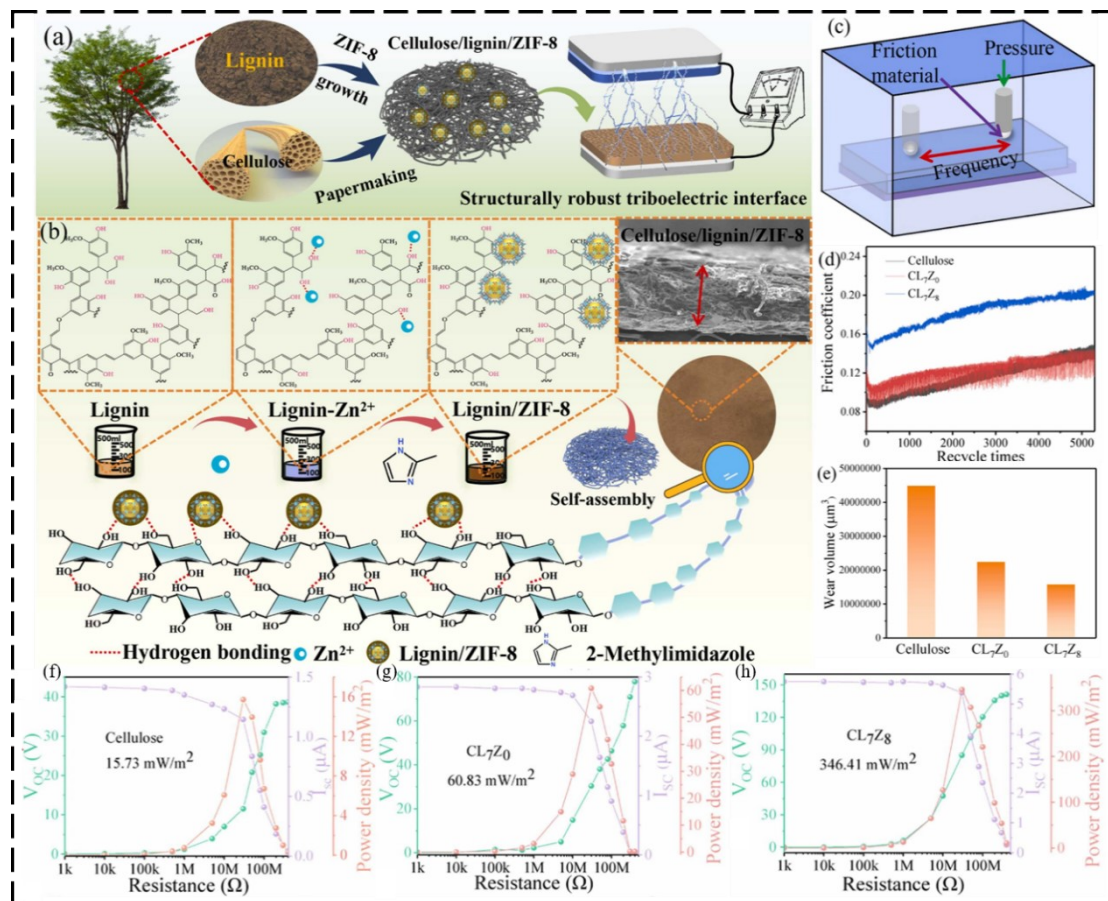

**Fig. 8** (a) Schematic diagram illustrating the fabrication of wear-resistant cellulose-based triboelectric materials; (b) Detailed evolution process of the interactions involved; (c) Schematic of the tribological testing setup under 3 N and 3 Hz; (d) Coefficient of friction; (e) Wear volume; Output power density of (f) pristine cellulose, (g) CL<sub>7</sub>Z<sub>0</sub>, and (h) CL<sub>7</sub>Z<sub>8</sub>. Reproduced from Ref. [31] with permission from the Elsevier, copyright

# Copyright License Certificate for Fig. 8

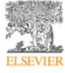

## Wear-resistant cellulosic triboelectric material for robust human-machine interface and high-performance self-powered sensing

**Author:** Chao Li, Liucheng Wang, Chenglong Fu, Jiaji Yue, Yehan Tao, Jinwen Hu, Dong Lv, Haisong Wang, Daoai Wang, Jian Du  
**Publication:** Nano Energy  
**Publisher:** Elsevier  
**Date:** March 2025

© 2025 Elsevier Ltd. All rights are reserved, including those for text and data mining, AI training, and similar technologies.

### Order Completed

Thank you for your order.

This Agreement between Zepeng Zhang ("You") and Elsevier ("Elsevier") consists of your license details and the terms and conditions provided by Elsevier and Copyright Clearance Center.

Your confirmation email will contain your order number for future reference.

**License Number** 6238760194505

[Printable Details](#)

**License date** Mar 30, 2026

#### Licensed Content

**Licensed Content Publisher** Elsevier  
**Licensed Content Publication** Nano Energy  
**Licensed Content Title** Wear-resistant cellulosic triboelectric material for robust human-machine interface and high-performance self-powered sensing  
**Licensed Content Author** Chao Li, Liucheng Wang, Chenglong Fu, Jiaji Yue, Yehan Tao, Jinwen Hu, Dong Lv, Haisong Wang, Daoai Wang, Jian Du  
**Licensed Content Date** Mar 1, 2025  
**Licensed Content Volume** 135  
**Licensed Content Issue** n/a  
**Licensed Content Pages** 1

#### Order Details

**Type of Use** reuse in a journal/magazine  
**Requestor type** academic/educational institute  
**Portion** figures/tables/illustrations  
**Number of figures/tables/illustrations** 3  
**Format** electronic  
**Are you the author of this Elsevier article?** No  
**Will you be translating?** No

#### About Your Work

**Title of new article** The impact and application of lignin fillers in triboelectric nanogenerators: from performance optimization to sustainable energy technology  
**Lead author** Zepeng Zhang, Xiaoxue Zhao, Caixing Huang, Chenhuan Lai, Qiang Yong  
**Title of targeted journal** Green Chemistry  
**Publisher** Royal Society of Chemistry  
**Expected publication date** Apr 2026

#### Additional Data

**Portions** Figure 1, Figure-3, Figure 4  
**The Requesting Person / Organization to Appear on the License** Zepeng Zhang

#### Requestor Location

Mr. Zepeng Zhang  
General Delivery

#### Tax Details

#### Requestor Location

Nanjing, 210037

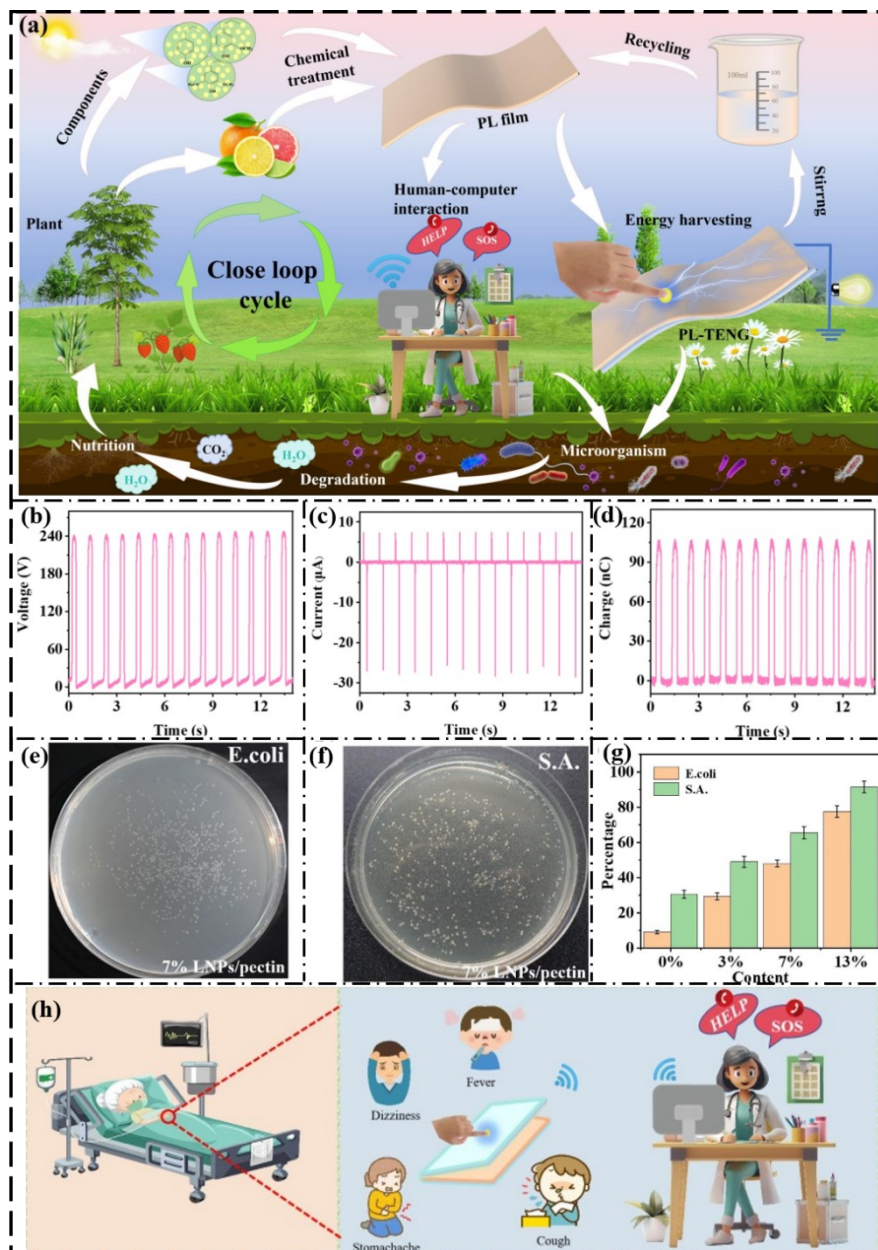

**Fig. 9** (a) Schematic illustration of the biodegradability and recyclability of the PL film and the PL-TENG. (b) Open-circuit voltage (V<sub>oc</sub>), (c) short-circuit current (I<sub>sc</sub>), and (d) transferred charge of the PL-TENG measured at an operating frequency of 1 Hz. Antibacterial effects of the 7% LNP/pectin film against (e) *E. coli* and (f) *S. aureus*. (g) Comparison of bacterial inhibition rates for pectin films with different LNP contents. (h) Schematic illustrating the interaction between a patient and a doctor via a wearable PL film-based TENG sensor. Reproduced from Ref. [142] with permission from the

# Copyright License Certificate for Fig. 9

|                                                                                                                                                                                                                       |                                                                                                                                                                                                                                                                                                                                                                                                                                                                                                                                              |
|-----------------------------------------------------------------------------------------------------------------------------------------------------------------------------------------------------------------------|----------------------------------------------------------------------------------------------------------------------------------------------------------------------------------------------------------------------------------------------------------------------------------------------------------------------------------------------------------------------------------------------------------------------------------------------------------------------------------------------------------------------------------------------|
|                                                                                                                                      | <b>Triboelectric materials with UV protection, anti-bacterial activity, and green closed-loop recycling for medical monitoring</b><br><b>Author:</b> Jandan Liang, Qiuxiang Yang, Ce Zhang, Wen Jiang, Shounian Cheng, Yang Tao, Lin Peng, Yu Han, Xia Cao, Zhong Lin Wang<br><b>Publication:</b> Chemical Engineering Journal<br><b>Publisher:</b> Elsevier<br><b>Date:</b> 1 January 2025<br><small>© 2024 Elsevier B.V. All rights are reserved, including those for text and data mining, AI training, and similar technologies.</small> |
| <b>Order Completed</b>                                                                                                                                                                                                |                                                                                                                                                                                                                                                                                                                                                                                                                                                                                                                                              |
| Thank you for your order.<br>This Agreement between Zepeng Zhang ("You") and Elsevier ("Elsevier") consists of your license details and the terms and conditions provided by Elsevier and Copyright Clearance Center. |                                                                                                                                                                                                                                                                                                                                                                                                                                                                                                                                              |
| Your confirmation email will contain your order number for future reference.                                                                                                                                          |                                                                                                                                                                                                                                                                                                                                                                                                                                                                                                                                              |
| <b>License Number</b>                                                                                                                                                                                                 | 6238761043197 <a href="#">Printable Details</a>                                                                                                                                                                                                                                                                                                                                                                                                                                                                                              |
| <b>License date</b>                                                                                                                                                                                                   | Mar 30, 2026                                                                                                                                                                                                                                                                                                                                                                                                                                                                                                                                 |
| <b>Licensed Content</b>                                                                                                                                                                                               |                                                                                                                                                                                                                                                                                                                                                                                                                                                                                                                                              |
| <b>Licensed Content Publisher</b>                                                                                                                                                                                     | Elsevier                                                                                                                                                                                                                                                                                                                                                                                                                                                                                                                                     |
| <b>Licensed Content Publication</b>                                                                                                                                                                                   | Chemical Engineering Journal                                                                                                                                                                                                                                                                                                                                                                                                                                                                                                                 |
| <b>Licensed Content Title</b>                                                                                                                                                                                         | Triboelectric materials with UV protection, anti-bacterial activity, and green closed-loop recycling for medical monitoring                                                                                                                                                                                                                                                                                                                                                                                                                  |
| <b>Licensed Content Author</b>                                                                                                                                                                                        | Jandan Liang, Qiuxiang Yang, Ce Zhang, Wen Jiang, Shounian Cheng, Yang Tao, Lin Peng, Yu Han, Xia Cao, Zhong Lin Wang                                                                                                                                                                                                                                                                                                                                                                                                                        |
| <b>Licensed Content Date</b>                                                                                                                                                                                          | Jan 1, 2025                                                                                                                                                                                                                                                                                                                                                                                                                                                                                                                                  |
| <b>Licensed Content Volume</b>                                                                                                                                                                                        | 503                                                                                                                                                                                                                                                                                                                                                                                                                                                                                                                                          |
| <b>Licensed Content Issue</b>                                                                                                                                                                                         | n/a                                                                                                                                                                                                                                                                                                                                                                                                                                                                                                                                          |
| <b>Licensed Content Pages</b>                                                                                                                                                                                         | 1                                                                                                                                                                                                                                                                                                                                                                                                                                                                                                                                            |
| <b>About Your Work</b>                                                                                                                                                                                                |                                                                                                                                                                                                                                                                                                                                                                                                                                                                                                                                              |
| <b>Title of new article</b>                                                                                                                                                                                           | The impact and application of lignin fillers in triboelectric nanogenerators: from performance optimization to sustainable energy technology                                                                                                                                                                                                                                                                                                                                                                                                 |
| <b>Lead author</b>                                                                                                                                                                                                    | Zepeng Zhang, Xiaoxue Zhao, Caixing Huang, Chenhuan Lai, Qiang Yong                                                                                                                                                                                                                                                                                                                                                                                                                                                                          |
| <b>Title of targeted journal</b>                                                                                                                                                                                      | Green Chemistry                                                                                                                                                                                                                                                                                                                                                                                                                                                                                                                              |
| <b>Publisher</b>                                                                                                                                                                                                      | Royal Society of Chemistry                                                                                                                                                                                                                                                                                                                                                                                                                                                                                                                   |
| <b>Expected publication date</b>                                                                                                                                                                                      | Apr 2026                                                                                                                                                                                                                                                                                                                                                                                                                                                                                                                                     |
| <b>Requestor Location</b>                                                                                                                                                                                             |                                                                                                                                                                                                                                                                                                                                                                                                                                                                                                                                              |
|                                                                                                                                                                                                                       | Mr. Zepeng Zhang<br>General Delivery                                                                                                                                                                                                                                                                                                                                                                                                                                                                                                         |
| <b>Requestor Location</b>                                                                                                                                                                                             | Nanjing, 210037                                                                                                                                                                                                                                                                                                                                                                                                                                                                                                                              |
| <b>Order Details</b>                                                                                                                                                                                                  |                                                                                                                                                                                                                                                                                                                                                                                                                                                                                                                                              |
| <b>Type of Use</b>                                                                                                                                                                                                    | reuse in a journal/magazine                                                                                                                                                                                                                                                                                                                                                                                                                                                                                                                  |
| <b>Requestor type</b>                                                                                                                                                                                                 | academic/educational/institute                                                                                                                                                                                                                                                                                                                                                                                                                                                                                                               |
| <b>Portion</b>                                                                                                                                                                                                        | figures/tables/illustrations                                                                                                                                                                                                                                                                                                                                                                                                                                                                                                                 |
| <b>Number of figures/tables/illustrations</b>                                                                                                                                                                         | 3                                                                                                                                                                                                                                                                                                                                                                                                                                                                                                                                            |
| <b>Format</b>                                                                                                                                                                                                         | electronic                                                                                                                                                                                                                                                                                                                                                                                                                                                                                                                                   |
| <b>Are you the author of this Elsevier article?</b>                                                                                                                                                                   | No                                                                                                                                                                                                                                                                                                                                                                                                                                                                                                                                           |
| <b>Will you be translating?</b>                                                                                                                                                                                       | No                                                                                                                                                                                                                                                                                                                                                                                                                                                                                                                                           |
| <b>Additional Data</b>                                                                                                                                                                                                |                                                                                                                                                                                                                                                                                                                                                                                                                                                                                                                                              |
| <b>Portions</b>                                                                                                                                                                                                       | Figure 1, Figure 2, Figure 6                                                                                                                                                                                                                                                                                                                                                                                                                                                                                                                 |
| <b>The Requesting Person / Organization to Appear on the License</b>                                                                                                                                                  | Zepeng Zhang                                                                                                                                                                                                                                                                                                                                                                                                                                                                                                                                 |
| <b>Tax Details</b>                                                                                                                                                                                                    |                                                                                                                                                                                                                                                                                                                                                                                                                                                                                                                                              |

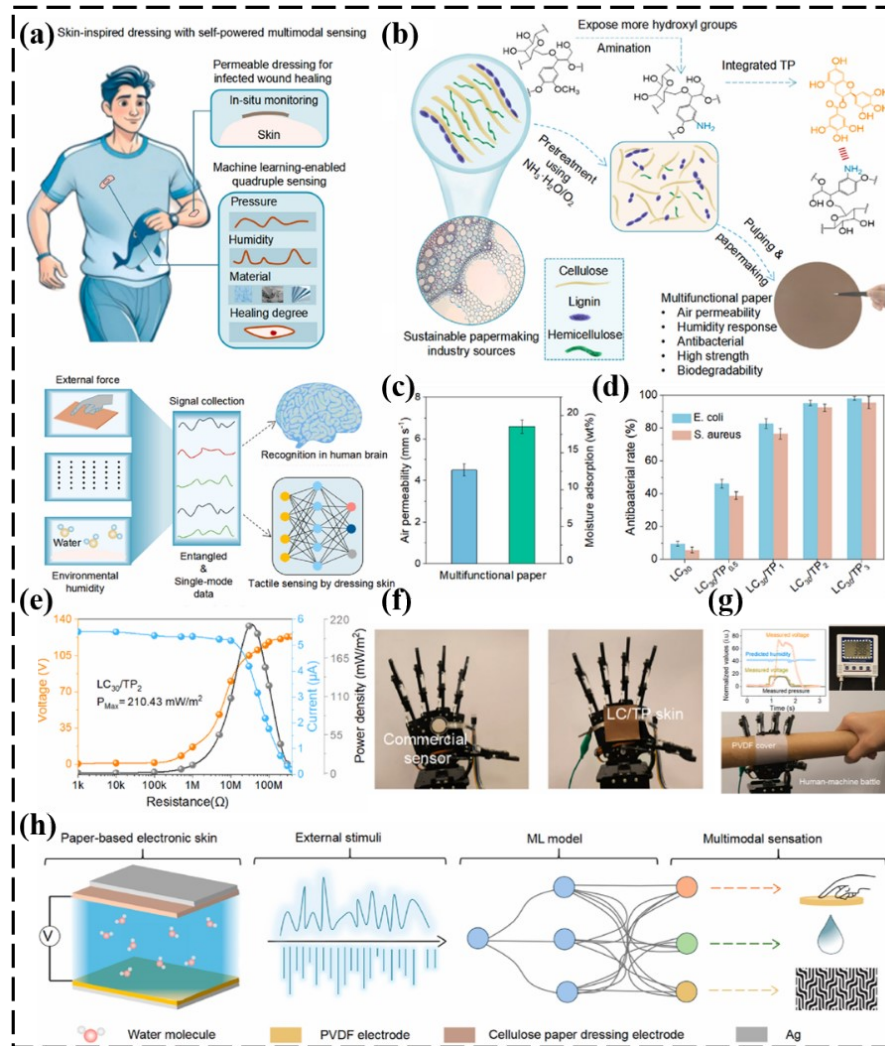

**Fig. 10** (a) Schematic diagram of the lignocellulose paper-based dressing, which promotes human skin healing and enables self-powered quadruple sensing. (b) Illustration of the fabrication process of the lignocellulose paper dressing and the amination of lignin during the pretreatment. (c) Air permeability and moisture absorption of the  $\text{LC}_{30}/\text{TP}_2$  composite paper. (d) Antibacterial rate of the lignocellulose paper dressing as a function of TP doping content. (e) Calculated output power density of the  $\text{LC}_{30}/\text{TP}_2$ -based triboelectric nanogenerator. (f) Sensor assembly on a robotic hand and a photograph of a human-robot competition. (g) Synchronous monitoring of material type, pressure, and humidity using the LC/TP TENG. (h) Schematic diagram illustrating the simultaneous monitoring of pressure, humidity, and material type based on a well-designed machine learning model.

Reproduced from Ref. [111] with permission from the Elsevier, copyright 2026.

# Copyright License Certificate for Fig. 10

|                                                                                                                                                                                                                                                                                                                                                                                                                                                                                                                                                                    |                                                                                                                                                                                                                           |
|--------------------------------------------------------------------------------------------------------------------------------------------------------------------------------------------------------------------------------------------------------------------------------------------------------------------------------------------------------------------------------------------------------------------------------------------------------------------------------------------------------------------------------------------------------------------|---------------------------------------------------------------------------------------------------------------------------------------------------------------------------------------------------------------------------|
|  <b>Natural lignocellulose fibers-based bio-dressing for accelerated wound healing and machine learning-assisted smart multimodal sensing</b><br>Author: Chao Lijian Du, Lingyu Zhu, Jinwen Hu, Chenglong Fujie Lu, Haishun Du, Haisong Wang, Dong Lv<br>Publication: Biomaterials<br>Publisher: Elsevier<br>Date: February 2026<br><small>© 2025 Elsevier Ltd. All rights are reserved, including those for text and data mining, AI training, and similar technologies.</small> |                                                                                                                                                                                                                           |
| <b>Order Completed</b><br>Thank you for your order.<br>This Agreement between Zepeng Zhang ("You") and Elsevier ("Elsevier") consists of your license details and the terms and conditions provided by Elsevier and Copyright Clearance Center.                                                                                                                                                                                                                                                                                                                    |                                                                                                                                                                                                                           |
| Your confirmation email will contain your order number for future reference.                                                                                                                                                                                                                                                                                                                                                                                                                                                                                       |                                                                                                                                                                                                                           |
| <b>License Number</b><br><b>License date</b>                                                                                                                                                                                                                                                                                                                                                                                                                                                                                                                       | 6238770128523<br>Mar 30, 2026                                                                                                                                                                                             |
| <a href="#">Printable Details</a>                                                                                                                                                                                                                                                                                                                                                                                                                                                                                                                                  |                                                                                                                                                                                                                           |
| <b>Licensed Content</b>                                                                                                                                                                                                                                                                                                                                                                                                                                                                                                                                            | <b>Order Details</b>                                                                                                                                                                                                      |
| <b>Licensed Content Publisher</b><br><b>Licensed Content Publication</b><br><b>Licensed Content Title</b><br><b>Licensed Content Author</b><br><b>Licensed Content Date</b><br><b>Licensed Content Volume</b><br><b>Licensed Content Issue</b><br><b>Licensed Content Pages</b>                                                                                                                                                                                                                                                                                    | <b>Type of Use</b><br><b>Requester type</b><br><b>Portion</b><br><b>Number of figures/tables/illustrations</b><br><b>Format</b><br><b>Are you the author of this Elsevier article?</b><br><b>Will you be translating?</b> |
| Elsevier<br>Biomaterials<br>Natural lignocellulose fibers-based bio-dressing for accelerated wound healing and machine learning-assisted smart multimodal sensing<br>Chao Lijian Du, Lingyu Zhu, Jinwen Hu, Chenglong Fujie Lu, Haishun Du, Haisong Wang, Dong Lv<br>Feb 1, 2026<br>325<br>n/a<br>1                                                                                                                                                                                                                                                                | reuse in a journal/magazine<br>academic/educational/institute<br>figures/tables/illustrations<br>3<br>electronic<br>No<br>No                                                                                              |
| <b>About Your Work</b>                                                                                                                                                                                                                                                                                                                                                                                                                                                                                                                                             | <b>Additional Data</b>                                                                                                                                                                                                    |
| <b>Title of new article</b><br><b>Lead author</b><br><b>Title of targeted journal</b><br><b>Publisher</b><br><b>Expected publication date</b>                                                                                                                                                                                                                                                                                                                                                                                                                      | <b>Portions</b><br><b>The Requesting Person / Organization to Appear on the License</b>                                                                                                                                   |
| The impact and application of lignin fillers in triboelectric nanogenerators: from performance optimization to sustainable energy technology<br>Zepeng Zhang, Xiaoxue Zhao, Caixing Huang, Chenhuan Lai, Qiang Yong<br>Green Chemistry<br>Royal Society of Chemistry<br>Apr 2026                                                                                                                                                                                                                                                                                   | Figure 1, Figure 3, Figure 6<br>Zepeng Zhang                                                                                                                                                                              |
| <b>Requestor Location</b>                                                                                                                                                                                                                                                                                                                                                                                                                                                                                                                                          | <b>Tax Details</b>                                                                                                                                                                                                        |
| Mr. Zepeng Zhang<br>General Delivery<br>Nanjing, 210037                                                                                                                                                                                                                                                                                                                                                                                                                                                                                                            |                                                                                                                                                                                                                           |

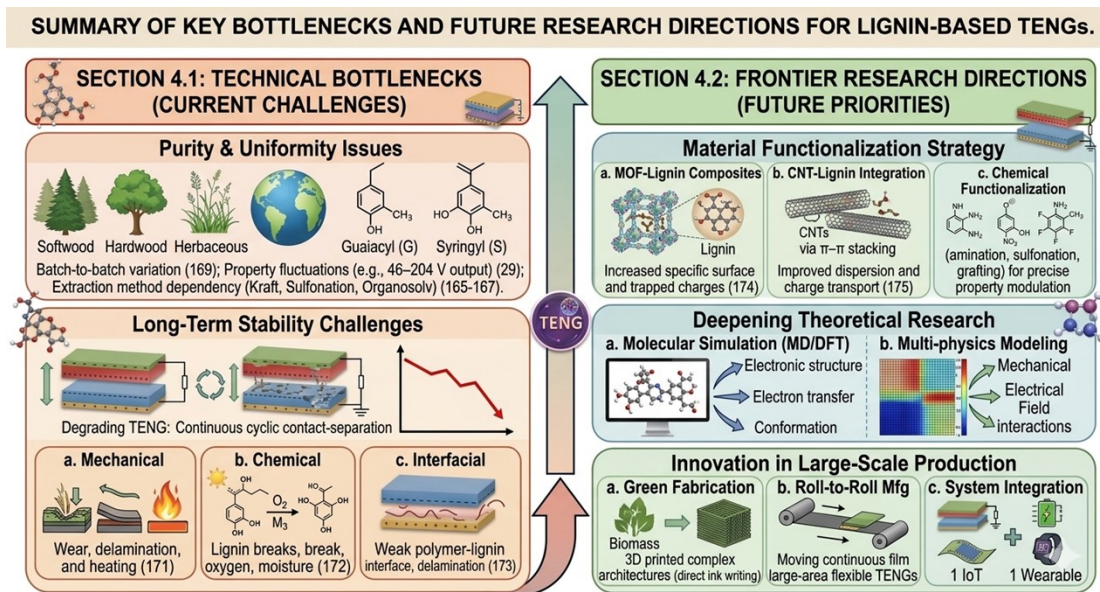

**Fig. 11** Schematic overview of current technical bottlenecks and future research directions for lignin-based triboelectric nanogenerators. The left panel summarizes the key challenges in material uniformity and long-term stability, including source-dependent structural variations, batch-to-batch fluctuations, and mechanical, chemical, and interfacial degradation mechanisms. The right panel illustrates the three main future research directions: material functionalization (MOF composites, CNT integration, and chemical modification), theoretical deepening (molecular simulation and multi-physics modeling), and scalable manufacturing (3D printing, roll-to-roll processing, and system integration). Relevant references are indicated in parentheses.

Fig. 11 is original content created by the authors; therefore, no copyright permission is needed.
